# Supplementary material for: Insect-Specific Virus Discovery: Significance for the Arbovirus Community
Source: Viruses. 2015 Sep 10;7(9):4911–28. doi: 10.3390/v7092851 (PMC4584295; doi:10.3390/v7092851)
Supplement: Supplementary File 1 [file viruses-07-02851-s001.xlsx]

## Sheet: Sheet1
Family	Virus (Abbreviation-subtype)	Strain	Genus	Location of first isolation	Year of isolation	Source species	Genbank Accession no
Rhabdoviridae	Ikoma (IKOV)	RV2508	Lyssavirus	Serengeti National Park, Tanzania	2009	Civettictis civetta	JX193798
	West Caucasian bat (WCBV)		Lyssavirus	Krasnodar, West Caucasus	2001	Miniopterus schreibersii	EF614258
	Shimoni bat (SBV)		Lyssavirus	Kenya	2009	Hipposideros commersoni	GU170201
	Mokola (MOKV)	RV1035	Lyssavirus	Zimbabwe	1982	Felis cattus	NC006429
	Lagos bat (LBV)	0406SEN	Lyssavirus	Senegal	1985	Eidolon helvum	NC020807
	Irkut (IRKV)		Lyssavirus	Irkutsk, Eastern Siberia	2002	Murina leucogaster	EF614260
	Ozernoe (OZEV)		Lyssavirus	Russia	2007	Homo sapiens	FJ905105
	European bat lyssavirus 1 (EBLV1)	9395GER	Lyssavirus	Germany	1968	Eptesicus serotinus	NC009527
	Duvenhage (DUVV)	86132SA	Lyssavirus	South Africa	1971	Homo sapiens	NC020810
	Rabies (RABV)	HN10	Lyssavirus	Hunan, China	2006	Homo sapiens	EU643590
	Aravan (ARAV)		Lyssavirus	Aravan, Kyrgyzstan	1991	Myotis blythi	EF614259
	Khujand (KHUV)		Lyssavirus	Khujand, Tajikstan	2001	Myotis mystacinus	EF614261
	European bat lyssavirus 2 (EBLV2)	RV1333	Lyssavirus	United Kingdom	2002	Homo sapiens	NC009528
	Australian bat lyssavirus (ABLV)		Lyssavirus	Queensland, Australia	1996	Saccolaimus flaviventris	AF081020
	Muir Springs (MSV)	76V-23524	Bahiavirus*	Fort Morgan, Colorado, USA	1976	Aedes spp.	KM204990
	Harlingen (HARV)	PV01-3828	Bahiavirus*	Harlingen, Texas, USA	2001	Culex salinarius	KM205003
	Bahia Grande (BGV)	TB4-1054	Bahiavirus*	Brownsville, Texas, USA	1974	Aedes solicitans	KM205018
	Moussa (MOUV)	D24	unassigned	Taï National Park, Côte d'Ivoire	2004	Culex decens	FJ985749
	New Minto (NMV)	579	Sawgravirus*	New Minto, Alaska	1972	Haemaphysalis leporispalustris	KM205009
	Connecticut (CNTV)	Ar1152-78	Sawgravirus*	Lyma, Connecticut, USA	1978	Ixodes dentatus	KM205020
	Sawgrass (SAWV)	64A-1247	Sawgravirus*	Tampa Bay, Florida	1964	Dermacentor variabilis	KM205013
	Puerto Almendras (PTAMV)	LO-39	Almendravirus*	Puerto Almendras, Loreto, Peru	2009	Ochlerotatus fulvus	KF534749
	Arboretum (ABTV)	LO-121	Almendravirus*	Puerto Almendras, Loreto, Peru	2009	Psorophora albigenu	KC994644
	North Creek (NORCV)#	954	unassigned	Ballina, NSW	1997	Culex sitiens	KF360973
	Durham (DURV)	CC228-C5	Tupavirus	Durham county, North Carolina, USA	2005	Fulica americana	KF310911
	Tupaia (TUPV)		Tupavirus	Thailand (imported to Germany)	unknown	Tupaia belangeri	FJ952155
	Klamath (KLAV)	M-1056	Tupavirus*	Klamath Falls, Oregon, USA	1962	Microtus montanus	NC007020
	Garba (GARV)	DakAnB439a	unassigned	Garba, Central African Republic	1970	Corythornis cristata	KM204982
	Kwatta (KWAV)	A-57	unassigned	Paramaribo, Surinam	1964	Culex sp.	KM204985
	Oak Vale (OVRV)	K13965	unassigned	Queensland, Australia	1993	Pool of Anopheles annulipes and Culex edwardsi	JF705877
	Sripur (SRIV)	733646	Sripuvirus*	Sripur, India	1973	Sergentomiya spp.	KM205023
	Niakha (NIAV)	DakArD88909	Sripuvirus*	Niakha, Senegal	1992	Phlebotomus duboscqi and Sergentomyia spp.	KC585008
	Chaco (CHOV)	BeAn42217	Sripuvirus*	Para, Brazil	1962	Ameiva ameiva ameiva	KM205000
	Sena Madureira (SMV)	BeAn303197	Sripuvirus*	Acre, Brazil	1976	Ameiva ameiva ameiva	KM205004
	Drosophila melanogaster sigmavirus (DMelSV)	HAP23	Sigmavirus	France	unknown	Drosophila melanogaster	GQ375258
	Drosophila obscura sigmavirus (DObSV)	10A	Sigmavirus	United Kingdom	2007	Drosophila obscura	GQ375258
	Nkolbisson (NKOV)	YM 31-65	Ledantevirus*	Nkolbisson, Cameroon	1965	Eretmapodites leucopus	NC022580
	Nishimuro (NISV)		Ledantevirus*	Nishimuro, Japan		Sus scrofa	AB609604
	Fukuoka (FUKV)	FUK-11	Ledantevirus*	Fukuoka, Kyushu, Japan	1982	Culicoides punctatus	KM205001
	Barur (BARV)	6235	Ledantevirus*	Barur, India	1962	Rattus rattus wroughtoni	AB609604
	Kern Canyon (KCV)		Ledantevirus*	Kern County, California USA	1956	Myotis yumanensis	KM204992
	Le Dantec (LDV)	DakHD763	Ledantevirus*	Le Dantec Hospital, Senegal	1965	Homo sapiens	KM205006
	Keuraliba (KEUV)	DakAnD5314	Ledantevirus*	Saboya, Senegal	1968	Tatera kempi	KM205021
	Mount Elgon bat (MEBV)	BP846	Ledantevirus*	Kimilili-Bungoma, Kenya	1964	Rhinolophus hilderbrandtii eloquens	KM205026
	Oita (OITAV)	296-1972	Ledantevirus*	Oita, Japan	1972	Rhinolophus cornutus	KM204998
	Fikirini (FKRV)	KEN352	Ledantevirus*	Shimoni region, South-eastern Kenya	2011	Hipposideros vittatus	KC676792
	Kolente (KOLEV)	DakArK7292	Ledantevirus*	Kindia region, Guinea	1985	Amblyomma variegatum	KC984953
	Siniperca chuatsi rhabdovirus (SCRV)		Perhabdovirus	China	unknown	Siniperca chuatsi	KC676792
	Eel virus X (EVEX)	CVI153311	Perhabdovirus	Netherlands	1992	Anguilla anguilla	KC984953
	Perch rhabdovirus (PRV)		Perhabdovirus	France	1980	Perca fluviatilis	NC008514
	Pike fry rhabdovirus (PFRV)	F4	Sprivivirus	France	1972	Esox lucius	NC022581
	Spring viremia of carp (SVCV)	S/30	Sprivivirus	Croatia	1969	Cyprinus carpio	NC020803
	Radi (RADIV)	ISS Phl-166	Vesiculovirus	Radi, Tuscany, Italy	1982	Phelbotomus perfiliewi	FJ872827
	Jurona (JURV)	BeAr40578	Vesiculovirus	Para, Brazil	1962	Haemagogus sp.	NC002803
	Malpais Spring (MSPV)	85-488NM	Vesiculovirus	Malpais Lava flow, New Mexico, USA	1985	Aedes campestris and Psorophora signipennis	KC412247
	Isfahan (ISFV)	91026-167	Vesiculovirus	Dormian Village, Isfahan, Iran	1975	Phlebotomus papatasi	NC020806
	Perinet (PERV)	DakArMg802	Vesiculovirus	Perinet, Madagascar	1978	Culex antennatus	KC412247
	Chandipura (CHNV)	CIN0451	Vesiculovirus	Gujarat, India	2004	Homo sapiens	NC020806
	VS New Jersey (VSNJV)	NJ89GAS	Vesiculovirus	Georgia, USA	1989	sandflies	HM566195
	Carajas (CARV)	BeAr411391	Vesiculovirus	Maraba, Para, Brazil	1983	Lutzomyia spp.	GU212856
	Cocal (COCV)	TRVL40233	Vesiculovirus	Trinidad	1961	Gigantolaelaps sp.	JX121110
	VS Alagoas (VSAV)	Indiana 3	Vesiculovirus	Brazil	1964	Equus caballis/Equus asinus	EU373658
	Maraba (MARV)	BeAr411459	Vesiculovirus	Maraba, Para, Brazil	1983	Lutzomyia spp.	EU373657
	VS Indiana (VSIV)	98COE	Vesiculovirus	Colorado, USA	1998	Equis ferus caballus	EU373658
	Morreton (MORV)	CoAr191048	Vesiculovirus	Arboledas and Durania, Colombia	1986	Lutzomyia spp.	HQ660076
	La Joya (LJV)	J-134	Hapavirus*	Pacora, Panama	1958	Culex dunni	AF473864
	Wongabel (WONV)	CS264	Hapavirus*	Atherton Tablelands, Queensland, Australia	1979	Culicoides austropalpalis	NC011639
	Parry Creek (PCV)	OR189	Hapavirus*	Kunnanurra, Western Australia	1973	Culex annulirostris	KM204988
	Ord River (ORV)	OR1023	Hapavirus*	Kunnanurra, Western Australia	1976	Culex annulirostris	NC011639
	Ngaingan (NGAV)	MRM14556	Hapavirus*	Gulf of Carpentaria, Queensland, Australia	1970	Culicoides spp	NC013955
	Joinjakaka (JOIV)	AusMK7937	Hapavirus*	Joinjakaka, Sepik District, Papua-New Guinea	1966	Culicine spp.	KM205016
	Marco (MCOV)	BeAn40290	Hapavirus*	Utinga Forest, Brazil	1962	Ameiva ameiva ameiva	NC013955
	Gray Lodge (GLOV)	BFN3187	Hapavirus*	Butte, California, USA	1971	Culex tarsalis	KM205022
	Manitoba (MANV)	Mn936-77	Hapavirus*	Morris, Manitoba, Canada	1977	Culex tarsalis	KM205008
	Landjia (LJAV)	DakAnB769d	Hapavirus*	Landjia, Central African Republic	1970	Riparia paludicola	KM205010
	Mosqueiro (MQOV)	BeAr185559	Hapavirus*	Belem, Brazil	1970	Culex portesi	KM205014
	Hart Park (HPV)	AR7C	Hapavirus*	Hart Park, California, USA	1955	Culex tarsalis	KM205011
	Flanders (FLAV)	61-7484	Hapavirus*	Flanders, New York, USA	1961	Culiseta melanura	KM205002
	Mossuril (MOSV)	SAAr1995	Hapavirus*	Lumbo, Mozambique	1959	Culex sitiens	KM204993
	Kamese (KAMV)	MP6186	Hapavirus*	Moulokota Uganda	1967	Culex annulioris	KM204989
	Aruac (ARUV)	TRVL9223	unassigned	Melaju Forest, Trinidad	1955	Trichoprosopon theobaldi	KM204987
	Inhangapi (INHV)	BeAr177325	unassigned	Catu forest, Belem, Brazil	1969	Lutzomyia flaviscutellata	KM204991
	Itacaiunas (ITAV)	BeAr427036	Curiovirus*	Serra Norte, Para, Brazil	1984	Culicoides sp	KM204984
	Iriri (IRIRV)	BeAr408005	Curiovirus*	Altamira, Para, Brazil	1982	Lutzomyia spp.	KM204995
	Curionopolis (CURV)	BeAr440009	Curiovirus*	Serra Norte, Para, Brazil	1985	Culicoides sp.	KM204994
	Rochambeau (RBUV)	CaAr16102	Curiovirus*	Paramana, French Guiana	1973	Coquillettidia albicosta	KM205012
	Bas Congo (BASV)	na	Tibrovirus*	Mangala, Democratic Republic of Congo	2009	Homo sapiens	JX297815
	Coastal Plains (CPV)	DPP53	Tibrovirus	Coastal Plains, Northern Territory, Australia	1981	Bos taurus	GQ294473
	Sweetwater Branch (SWBV)	UF-11	Tibrovirus*	Key West, Florida, USA	1982	Culicoides insignis	KM204997
	Tibrogargan (TIBV)	CS132	Tibrovirus	Peachester, Queensland, Australia	1976	Culicoides brevitarsis	NC020804
	Bivens Arm (BAV)	UF-10	Tibrovirus*	Key West, Florida, USA	1982	Culicoides insignis	KM205019
	Yata (YATV)	DakArB2181	Ephemerovirus*	Birao, Central African Republic	1969	Mansonia uniformis	KM085030
	Koolpinyah (KOOLV)	DPP833/819	Ephemerovirus*	Berrimah, Northern Territory, Australia	1986	Bos taurus	KM085029
	Kotonkan (KOTV)	IbAr23380	Ephemerovirus	Ibadan, Nigeria	1967	Culicoides spp	HM474855
	Adelaide River (ARV)	DPP61	Ephemerovirus	Tortilla Flat, Northern Territory, Australia	1981	Bos taurus	JN935380
	Obodhiang (OBOV)	SudAr1154-64	Ephemerovirus	Malakal, Sudan	1963	Mansonia uniformis	HM856902
	Kimberley (KIMV)	CS368	Ephemerovirus	Tortilla Flat, Northern Territory, Australia	1980	Bos taurus	JQ941664
	Bovine ephemeral fever (BEFV)	CS1865	Ephemerovirus	Kowanyama, Queensland, Australia	1969	Bos taurus	NC002526
	Berrimah (BRMV)	DPP63	Ephemerovirus	Berrimah, Northern Territory, Australia	1981	Bos taurus	HM461974
Togaviridae	Salmon Pancreatic Disease (SPDV)		Alphavirus			Salmo salar	AJ316246
	Sleeping Disease (SDV)		Alphavirus				NC003433
	Southern Elephant Seal (SESV)		Alphavirus	Australia	2001	Mirounga leonine	HM147990
	Barmah Forest (BFV)	BH2193	Alphavirus	Australia	1974	Culex and Aedes spp.	U73745
	Middelburg (MIDV)	857	Alphavirus	South Africa	1957	Aedes spp.	EF536323
	Ndumu (NDUV)	SaAr2204	Alphavirus	South Africa	1959	Aedes spp.	HM147989
	Sagiyama (SAGV)	SAG2	Alphavirus	Japan	1956	Culex and Aedes spp.	AB032553
	Getah (GETV)	MM2021	Alphavirus	Malaysia	1955	Culex and Aedes spp.	AY702913
	Ross River (RRV)	QML1	Alphavirus	Australia	1959	Culex and Aedes spp.	GQ433354
	Bebaru (BEBV)	MM2354	Alphavirus	Malaysia	1956	Culex spp.	HM147985
	Mayaro (MAYV)	TVRL4675	Alphavirus	Trinidad	1954	Haemagogus sp.	EF536323
	Una (UNAV)	BeAr13136	Alphavirus	Brazil	1959	Psorophora and Aedes spp.	HM147992
	Chikungunya (CHIKV)	PO731460	Alphavirus	India	1973		HM045788
	O'nyong nyong (ONNV)	SG650	Alphavirus	Uganda	1996	Anopheles spp.	AF079456
	Venezuela equine encephalitis (VEEV-IAB)	71D-180	Alphavirus	Texas, USA	1971		L01442
	Venezuela equine encephalitis (VEEV-IC)	P676	Alphavirus	Venezuela	1963		AF375051
	Venezuela equine encephalitis (VEEV-ID)	3380	Alphavirus	Panama	1961		L00930
	Venezuela equine encephalitis (VEEV-IE)	MX01-32	Alphavirus	Chiapas State, Mexico	2001	Mesocricetus auratus	U34999
	Mosso das Pedras (VEEV-IF)	78V-3531	Alphavirus	Brazil	1978		AF075257
	Everglades (EVEV)	Fe3-7c	Alphavirus	Florida, USA	1963		AF075251
	Tonate (TONV)	CaAn 410d	Alphavirus	French Guiana	1973		AF075254
	Mucambo (MUCV)	BeAn 8	Alphavirus	Brazil	1954		AF075253
	Venezuela equine encephalitis (VEEV-IIIC)	71D-1252	Alphavirus	Peru	1971		AF075255
	Pixuna (PIXV)	BeAr 35645	Alphavirus	Brazil	1961		AF075256
	Cabassou (CABV)	CaAr 508	Alphavirus	French Guiana	1968		AF075259
	Rio Negro (RNV)	AG80-663	Alphavirus	Argentina	1980		AF075258
	Eastern equine encephalitis (EEEV-Lin I)	FL93-939	Alphavirus	Florida, USA	1993	Culex melanura	EF151502
	Eastern equine encephalitis (EEEV-Lin II)	PE-3.0815	Alphavirus	Peru	1996	Culex and Aedes sp..	DQ241303
	Eastern equine encephalitis (EEEV-Lin III)	PE-0.0155	Alphavirus	Peru	1996		DQ241304
	Eastern equine encephalitis (EEEV-Lin IV)	BeAr436087	Alphavirus	Brazil			EF151503
	Trocara (TROV)	BeAr422431	Alphavirus	Brazil	1984	Culex serratus	HM147991
	Eilat (EILV)	EO329	Alphavirus	Israel	1983	Aedes caspians	This Study
	Aura (AURAV)	BeAr10315	Alphavirus	Brazil	1959	Culex (melanaconion) spp.	AF126284
	Buggy Creek (BCRV)	51V1822	Alphavirus	Oklahoma, USA	1980	Oecianus vicarious	HM147986
	Fort Morgan (FMV)	73V4009	Alphavirus	Colorado, USA	1973	Oecianus vicarious	GQ281603
	Highlands J (HJV)	585-01	Alphavirus	Florida, USA	1960	Oecianus vicarious	GU167952
	Sindbis (SINV)	HRSP	Alphavirus			Culex and Aedes spp.	NC001547
	Ockelbo (OCKV)	Edsbyn 82-5	Alphavirus	Sweden	1982	Culex and Aedes spp.	M69205
	Babanki (BBKV)	ArY 251 - 69	Alphavirus	Cameroon	1969	Culex and Aedes spp.	HM147984
	Sindbis (SINV)	XJ160	Alphavirus	China	1990	Culex and Aedes spp.	AF103728
	Sindbis (SINV)	SW6562	Alphavirus	Australia	1990	Culex and Aedes spp.	AF429428
	Whataroa (WHAV)	M78	Alphavirus	New Zealand	1962	Culiseta and Culex spp.	HM147993
	Western equine encephalitis (WEEV-NA)	71V-1658	Alphavirus	USA	1971	Culex and Aedes spp.	NC003908
	Western equine encephalitis (WEEV-SA)	AG80-646	Alphavirus	Argentina	1980	Culex and Aedes spp.	GQ287646
Mesoniviridae	Nam Dinh (NDiV)	NDV_01_03	Alphamesonivirus-1	Viet Nam	2003	Culex spp.	DQ458789
	Nam Dinh (NDiV)	JKT-9982	Alphamesonivirus-1	Ngewotan, Java, Indonesia	1981	Culex vishnui	KC807169
	Nam Dinh (NDiV)	V3872	Alphamesonivirus-1	Houston, Texas, USA	2004	Culex quinquefasciatus	KC807175
	Nam Dinh (NDiV)	V3982	Alphamesonivirus-1	Houston, Texas, USA	2004	Culex quinquefasciatus	KC807176
	Nam Dinh (NDiV)	16740	Alphamesonivirus-1	Houston, Texas, USA	2010	Aedes albopictus	KC807177
	Nam Dinh (NDiV)	16757	Alphamesonivirus-1	Houston, Texas, USA	2010	Aedes albopictus	KC807178
	Cavally (CAVV)	C79	Alphamesonivirus-1	Cote d'Ivoire	2004	Culex, Aedes, Uranotaenia and Anopheles spp.	HM746600
	Bontag Baru (BBaV)	JKT-7774	Alphamesonivirus-5	Bontag Baru, Kalimantan, Indonesia	1981	Culex vishnui	KC807173
	Bontag Baru (BBaV)	JKT-9891	Alphamesonivirus-5	Karang Sari, Java Indonesia	1981	Culex vishnui	KC807167
	Bontag Baru (BBaV)	JKT-9853	Alphamesonivirus-5	Cilacap, Java, Indonesia	1981	Culex tritaeniorhynchus	KC807168
	Bontag Baru (BBaV)	JKT-9876	Alphamesonivirus-5	Cilacap, Java, Indonesia	1981	Culex vishnui	KC807166
	Karang Sari (KSaV)	JKT-10701	Alphamesonivirus-6	Karang Sari, Java, Indonesia	1981	Culex vishnui	KC807171
	Kamphaeng Phet	KP 84-0192	Alphamesonivirus-7	Kamphaeng Phet, Thailand	1985	unknown mosquito pool	KC807174
	Kamphaeng Phet	KP 84-0344	Alphamesonivirus-7	Kamphaeng Phet, Thailand	1984	unknown mosquito pool	KC807172
	Kamphaeng Phet	KP 84-0156	Alphamesonivirus-7	Kamphaeng Phet, Thailand	1984	unknown mosquito pool	KC807170
	Nse (NseV)	F24	unassigned	Cote d'Ivoire	2004	Culex nebulosus	JQ957874
	Meno (MenoV)	E9	unassigned	Cote d'Ivoire	2004	Uranotaenia chorleyi	JQ957873
	Hana (HanaV)	A4	unassigned	Cote d'Ivoire	2004	Culex sp.	JQ957872
Negevirus	Citrus leprosis (CCLV-C)		Cilevirus	Brazil	2005	unknown	DQ157466
	Citrus leprosis (CCLV-C)	Cordeiropolis	Cilevirus	Brazil	2006	Citrus sinensis var. Pera	NC_008169
	Citrus leprosis (CCLV-C)	Panama	Cilevirus	Panama	2006	Citrus sp	DQ388512
	Loreto (LORV)	3940-83	Nelorpivirus	Lima, Peru	1983	Anopheles albimanus	JQ675610
	Loreto (LORV)	Pe AR 2617/77	Nelorpivirus	Iquitos, Loreto, Peru	1977	Lutzomyia sp.	JQ675611
	Loreto (LORV)	Pe AR 2612/77	Nelorpivirus	Iquitos, Loreto, Peru	1977	Culex sp.	JQ675612
	Ngewotan (NWTV)	JKT 9982	Nelorpivirus	Wotan, Java, Indonesia	1981	Culex vishnui	KC807170
	Negev (NEGV)	EO-239	Nelorpivirus	Negev, Israel	1983	Anopheles coustani	JQ675605
	Negev (NEGV)	M33056	Nelorpivirus	Harris Co., Texas, USA	2008	Culex quinquefasciatus	JQ675608
	Negev (NEGV)	M30957	Nelorpivirus	Harris Co., Texas, USA	2008	Culex coronator	JQ675609
	Piura (PIUV)	P60	Nelorpivirus	Piura, Peru	1996	Culex spp.	JQ675607
	Brajeira (BRJV)	AR800233B	Nelorpivirus	Brazil	2013	Culex spp.	KM350514
	Brajeira (BRJV)	AR800224	Nelorpivirus	Brazil	2013	Culex spp.	KM350512
	Brajeira (BRJV)	AR800239	Nelorpivirus	Brazil	2013	Psorophora ferox	KM350515
	Brajeira (BRJV)	AR800227	Nelorpivirus	Brazil	2013	Culex spp.	KM350513
	Brajeira (BRJV)	AR800213B	Nelorpivirus	Brazil	2013	Culex spp.	KM350510
	Brajeira (BRJV)	AR800214	Nelorpivirus	Brazil	2013	Culex spp.	KM350511.
	Brajeira (BRJV)	AR800208B	Nelorpivirus	Brazil	2013	Culex spp.	KM350508
	Brajeira (BRJV)	AR800212B	Nelorpivirus	Brazil	2013	Culex spp.	KM350509
	Goutanap (GANV)	F55	Sandewavirus	Cote d'Ivoire	2004	Culex and Culicinae spp.	KF588039
	Goutanap (GANV)	F47	Sandewavirus	Cote d'Ivoire	2004	Culex and Culicinae spp.	KF588037
	Goutanap (GANV)	F35	Sandewavirus	Cote d'Ivoire	2004	Culex and Culicinae spp.	KF588036
	Goutanap (GANV)	F54	Sandewavirus	Cote d'Ivoire	2004	Culex and Culicinae spp.	KF588038
	Santana (SANV)	BeAR 517449	Sandewavirus	Santana, Amapa, Brazil	1992	Culex spp.	JQ675606
	Tanay (TANAV)	11_2	Sandewavirus	Tanay, Luzon Island, The Philippines	2005	Culex spp.	NC_024071
	Tanay (TANAV)	11_3	Sandewavirus	Tanay, Luzon Island, The Philippines	2005	Culex spp.	KF425262
	Tanay (TANAV)	11_4	Sandewavirus	Tanay, Luzon Island, The Philippines	2005	Armigeres spp.	KF425263
	Tanay (TANAV)	11_5	Sandewavirus	Tanay, Luzon Island, The Philippines	2005	Armigeres spp.	KF425264
	Dezidougou (DEZV)	ArA 20086	Sandewavirus	Dezidougou, Cote d'Ivoire	1987	Aedes aegypti	JQ675604
	Wallerfield (WALV)	TR7904	Sandewavirus	Trinidad and Tobago	2009	Culex spp.	KF042857
	Wallerfield (WALV)	AR800233A	Sandewavirus	Brazil	2013	Culex spp.	KM350507
	Wallerfield (WALV)	AR800208A	Sandewavirus	Brazil	2013	Culex spp.	KM350504
	Wallerfield (WALV)	AR800213A	Sandewavirus	Brazil	2013	Culex spp.	KM350506
	Wallerfield (WALV)	AR800212A	Sandewavirus	Brazil	2013	Culex spp.	KM350505
Flaviviridae	Kamiti River virus (KRV)	SR-75	Flavivirus	Kenya		Ae. macintoshi	AY149904
	Kamiti River virus (KRV)	SR-82	Flavivirus	Kenya		Ae. macintoshi	AY149905
	Cell fusing agent virus (CFAV)	n/a	Flavivirus				NC_001564
	Aedes flavivirus (AeFV)	Narita-21	Flavivirus	Narita, Japan	2003	Ae. albopictus	AB488408
	Aedes flavivirus (AeFV)	SPFLD	Flavivirus	Springfield, Missouri, USA	2009	Ae. albopictus	KC181923
	Nakiwogo (NAKV)	Uganda08	Flavivirus	Uganda	2008	Mansonia africana nigerrima	GQ165809
	Quang Binh (QBV)	VN180	Flavivirus	Viet Nam	2002	Culex tritaeniorhynchus	NC_012671
	Culex flavivirus (CxFV)	HOU24518	Flavivirus	USA	2008	Culex quinquefasciatus	FJ502995
	Culex flavivirus (CxFV)	UGANDA08	Flavivirus	Uganda	2008	Culex quinquefasciatus voucher	GQ165808
	Culex flavivirus (CxFV)	CxFV-Mex07	Flavivirus	Mexico	2007	Culex quinquefasciatus	EU879060
	Culex flavivirus (CxFV)	Iowa07	Flavivirus	Iowa, USA	2007	Culex pipiens	FJ663034
	Culex flavivirus (CxFV)	SDDM06-11	Flavivirus	China	2006	Culex pipiens	JQ518484
	Culex flavivirus (CxFV)	H0901	Flavivirus	Liaoning, China	2009	Culex pipiens pallens	HQ678513
	Culex flavivirus (CxFV)	HLD105	Flavivirus	Liaoning, China	2010	Culex pipiens pallens	JQ308187
	Culex flavivirus (CxFV)	DG1007	Flavivirus	China	2010	Culex tritaeniorhynchus	JQ308190
	Culex flavivirus (CxFV)	DG1068	Flavivirus	China	2010	Culex pipiens pallens	JQ308189
	Culex flavivirus (CxFV)	Toyama2627	Flavivirus	Toyama, Japan	2008	Culex pipiens group	AB701776
	Culex flavivirus (CxFV)	NIID-21-2	Flavivirus	Tokyo, Japan	2003	Culex pipiens	AB377213
	Culex flavivirus (CxFV)	Tokyo	Flavivirus	Tokyo, Japan	2003	Culex pipiens	AB262759
	Culex flavivirus (CxFV)	Toyama1849	Flavivirus	Toyama, Japan	2007	Culex tritaeniorhynchus	AB701769
	Culex flavivirus (CxFV)	Toyama861	Flavivirus	Toyama, Japan	2005	Culex pipiens group	AB701774
	Culex flavivirus (CxFV)	Toyama1431	Flavivirus	Toyama, Japan	2006	Culex pipiens group	AB701775
	Modoc virus (MODV)	ApMAR	Flavivirus	Modoc county, USA	1958	Peromyscus maniculatus	AJ242984
	Apoi virus (APOIV)	Kitaoka	Flavivirus	Japan	1954	Apodemus speciosus and Apodemus argentosus hokkaidi	NC_003676
	Rio Bravo virus (RBV)	RiMAR	Flavivirus	Kern county, USA	1954	Tadarida brasilensis mexicana	AF144692
	Tyuleniy virus (TYUV)	LEIV 6C	Flavivirus	USA, Russia	1969	Ixodes putus	AF013410
	Meaban virus (MEAV)	Brest ART707	Flavivirus	France	1981	Ortithodoros (Alectorobius) maritimus	AF013386
	Saumarez Reef virus (SREV)	Australia	Flavivirus	Queensland, Australia	1974	Ortithodoros capensis	DQ235150
	Kadam virus (KADV)	AMP6640	Flavivirus	Uganda	1967	Rhipicephalus pravus	DQ235146
	Gadget's Gully virus (GGYV)	CSIRO122	Flavivirus	Macquire Island, Australia	1977	Ixodes (Ceratixodes) uriae	DQ235145
	Greek goat encephalitis virus (GGEV)	Vergina	Flavivirus	Greece	n/a	n/a	DQ235153
	Royal Farm virus (RFV)	ArT 371	Flavivirus	Afghanistan	1968	Argas hermanni	DQ235149
	Karshi virus (KSIV)	LEIV-2247	Flavivirus	Uzbekistan	1972	Ornithodoros papallipes	NC_006947
	Powassan virus (POWV)	DTVWiA08	Flavivirus	Spoone, USA	2008	Ixodes scapularis	HM440560
	Kyasanur forest disease virus (KFDV)	W371	Flavivirus	India	1957	Presbytis entellus	AF013385
	Alkhurma virus (AHFV)	1776	Flavivirus	Saudi Arabia	1995	Homo sapiens	NC_004355
	Langat virus (LGTV)	TP21	Flavivirus	Malaysia	1956	Rattus mulleri validus and R. sabanus vociferans	AF253419
	Omsk hemorrhagic fever virus (OHFV)	Kubrin	Flavivirus	Russia	1947	Dermacentor reticulates	AF013393
	Tick-borne encephalitis virus (TBEV)	Neudoerfl	Flavivirus	Austria	1971	Ixodes ricinus	U27495
	Tick-borne encephalitis virus (TBEV)	Sofjin-HO	Flavivirus	Japan	2000	n/a	AB062064
	Yokose virus (YOKV)	Oita 36	Flavivirus	Japan	1971	Miniopterus fuliginosus	AB114858
	Entebbe bat virus (ENTV)	UgIL-30	Flavivirus	Uganda	1957	Tadarida (Chaerephon) limbata	DQ837641
	Sepik virus (SEPV)	MK 7148	Flavivirus	Papua New Guinea	1966	Mansonia septempuntata	NC_008719
	Yellow fever virus (YFV)	TVP11767	Flavivirus	Trinidad and Tobago	2009	Alouatta seniculus	HM582851
	Yellow fever virus (YFV)	ASIBI	Flavivirus	Nigeria	1927	Homo sapiens	AY640589
	Edge Hill virus (EHV)	YMP 48	Flavivirus	Queensland, Australia	1961	Aedes vigilax	DQ859060
	Bouboui virus (BOUV)	DAK AR B490	Flavivirus	Central African Republic	1967	Anopheles paludis	DQ859057
	Potiskum virus (POTV)	IBAN 10069	Flavivirus	Nigeria	n/a	Cricetomys gambianus	DQ859067
	Uganda S virus (UGSV)	original	Flavivirus	Uganda	1947	Aedes spp.	DQ859065
	Nanay virus (NANV)	PRD316/PER/09	Flavivirus	Peru	2009	Culex (Melanaconion) occossa	JX627335
	Nounane virus (NOUV)	Nounane B3	Flavivirus	Cote d'Ivoire	2004	Uranotaenia mashonaensis	EU159426
	Donggang virus (DGV)	DG0909	Flavivirus	China	2009	Aedes spp.	JQ086551
	Lammi virus (LAMV)	n/a	Flavivirus	Finland	2004	unspecified mosquito pool	FJ606789
	Chaoyang virus (CHAOV)	Deming	Flavivirus	China	2008	n/a	FJ883471
	Chaoyang virus (CHAOV)	ROK144	Flavivirus	South Korea	2003	Aedes vexans nipponii	JQ068102
	Chaoyang virus (CHAOV)	HLD115	Flavivirus	China	2010	unspecified mosquito pool	JQ308185
	Dengue 4 (DENV4)	BID-V2448	Flavivirus	USA	1999	Homo sapiens	FJ882601
	Dengue 1 (DENV1)	BID-V534	Flavivirus	Nicaragua	2005	Homo sapiens	JN819402
	Dengue 2 (DENV2)	BID-V2599	Flavivirus	Nicaragua	2006	Homo sapiens	HQ733861
	Dengue 3 (DENV3)	BID-V5467	Flavivirus	Nicaragua	2010	Homo sapiens	JF920405
	Zika virus (ZIKV)	2007 EC	Flavivirus	Micronesia	2007	Homo sapiens	EU545988
	Spondweni virus (SPOV)	SM-6 V-1	Flavivirus	South Africa	1995	Mansonia uniformis	DQ859064
	Kokobera virus (KOKV)	AusMRM 32	Flavivirus	Australia	1960	Culex annulirostris	AY632541
	Iguape virus (IGUV)	SPAn 71686	Flavivirus	Brazil	1979	n/a	AY632538
	St. Louis encephalitis virus (SLEV)	Kern217	Flavivirus	USA	1933	Homo sapiens	DQ525916
	St. Louis encephalitis virus (SLEV)	79V-2533	Flavivirus	Argentina	1978	Culex spp.	FJ753287
	Bagaza virus (BAGV)	DakAr B209	Flavivirus	Central African Republic	1988	Culex spp.	AY632545
	Rocio virus (ROCV)	SPH 34675	Flavivirus	Brazil	1975	Homo sapiens	AY632542
	Ilheus virus (ILHV)	Original	Flavivirus	Brazil	1944	Aedes and Psorophora mosquito pools	AY632539
	Kunjin virus (KUNV)	MRM16	Flavivirus	Australia	1960	Culex annulirostris	AF458351
	West Nile virus (WNV)	BID-V4343	Flavivirus	USA	2002	Cyanocitta cristata	HQ671742
	West Nile virus (WNV)	BID-V5218	Flavivirus	USA	2008	Culex salinarius	JF920747
	Japanese encephalitis virus (JEV)	Tottori	Flavivirus	Japan	2003	Equus caballus	AB594829
	Usutu virus (USUV)	Vienna 2001	Flavivirus	Austria	2001	dead blackbird	NC_006551
	Murray Valley encephalitis virus (MVEV)	MVE-1-51	Flavivirus	Australia	1951	Homo sapiens	AF161266
	Alfuy virus (ALFV)	MRM3929	Flavivirus	Australia	1966	Centropus phasianius	AY898809
*Indicates new genera proposed by Walker et al (2015) and currently under consideration by the ICTV.
